# Supplementary material
Source: HighWire-hosted journal article supplement (http://dmd.aspetjournals.org/highwire/filestream/66227/field_highwire_adjunct_files/0/Correction_to_DMD-8508.pdf)
Supplement: Correction_to_DMD-8508.pdf [file Correction_to_DMD-8508.pdf]

## Correction to “Stereochemical Aspects of Itraconazole Metabolism In Vitro and In Vivo”

In the article referenced above [Kunze KL, Nelson WL, Kharasch EV, Thummel KE, and Isoherranen N (2006), *Drug Metab Dispos* **34**:583-590; doi:10.1124/dmd.105.008508], the stereochemical assignments of itraconazole and metabolite stereoisomers in Figs. 1 and 2 were incorrect. The corrected assignments and revised Figs. 1 and 2 are provided below. This error does not affect the identification of metabolized stereoisomers or the in vivo pharmacokinetic analysis in the manuscript. The error was solely in the figure labels.

The authors regret this error and any confusion it may have caused.

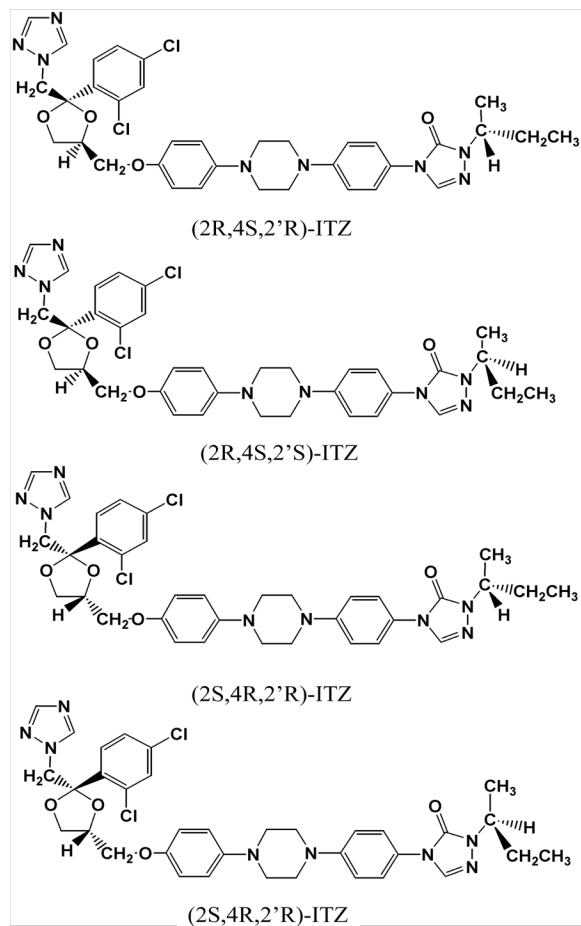

Fig. 1. Structures of the four stereoisomers of itraconazole.

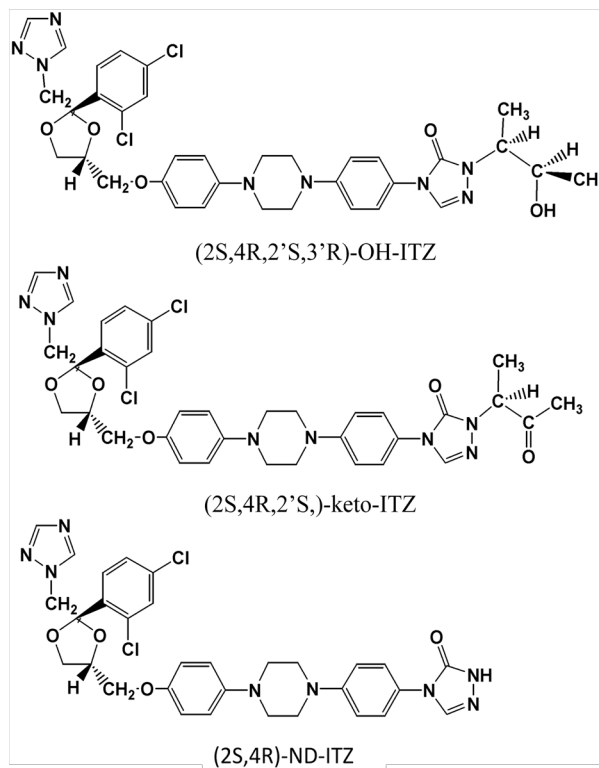

Fig. 2. Structures of the metabolites of itraconazole: OH-ITZ, keto-ITZ and ND-ITZ. Only one of the possible stereoisomers formed in vivo is depicted for each metabolite.
